# Supplementary material for: Energy transfer of imbalanced Alfvénic turbulence in the heliosphere
Source: PubMed Central journal article supplement (PMC10692179; doi:10.1038/s41467-023-43273-4), 2023-12-02
Supplement: 41467_2023_43273_MOESM2_ESM.pdf [file 41467_2023_43273_MOESM2_ESM.pdf]

## Description of Additional Supplementary Files

**Supplementary Movie 1:** Time evolution of  $\delta Z_x^+$ ,  $\delta Z_x^-$ ,  $|\delta Z^+|$ , and  $|\delta Z^-|$  for the time from 4.0 until 6.0 for the case with an initial cross-helicity of 0.7.

**Supplementary Movie 2:** Time evolution of the evolution term  $\frac{\partial \delta Z_x^\pm}{\partial t}$ , the nonlinear term  $-(\delta \mathbf{Z}^\mp \cdot \nabla) \delta Z_x^\pm$ , the linear term  $\pm(\mathbf{V}_{A0} \cdot \nabla) \delta Z_x^\pm$ , and the power spectra of  $-(\delta \mathbf{Z}^\mp \cdot \nabla) \delta Z_x^\pm$  and  $\pm(\mathbf{V}_{A0} \cdot \nabla) \delta Z_x^\pm$  for the time from 4.0 until 6.0 for the case with an initial cross-helicity of 0.7.
